# Supplementary material
Source: PubMed Central journal article supplement (PMC7969423)

Figure S1. Representative subthreshold depolarizations and spike firing following positive current injections

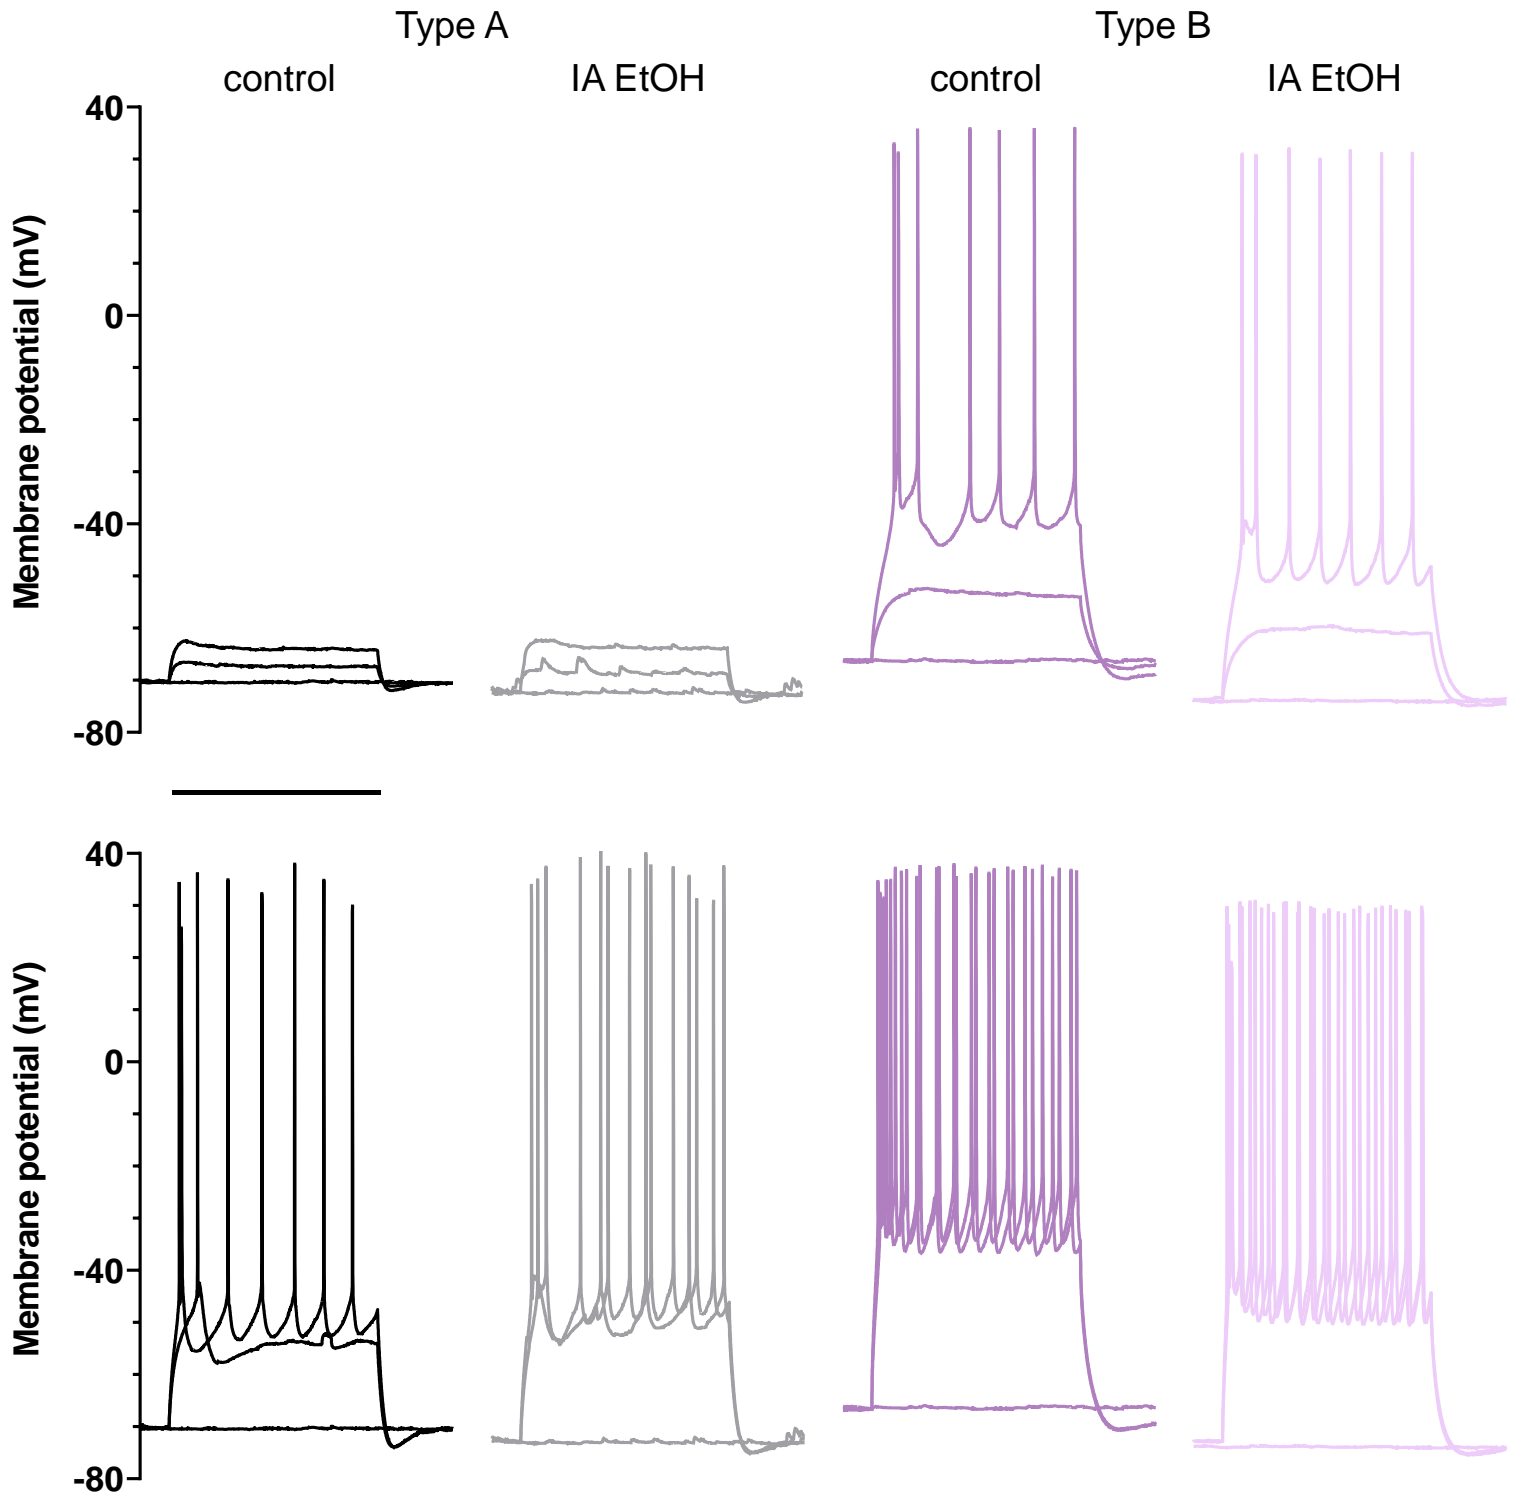

Supplement: NIHMS1661928-supplement-FIG_S1.pdf [file NIHMS1661928-supplement-FIG_S1.pdf]
