# Supplementary material
Source: PubMed Central journal article supplement (PMC7969423)

Figure S2. Comparable synaptic adaptations following IA ethanol in female mice and in male mice

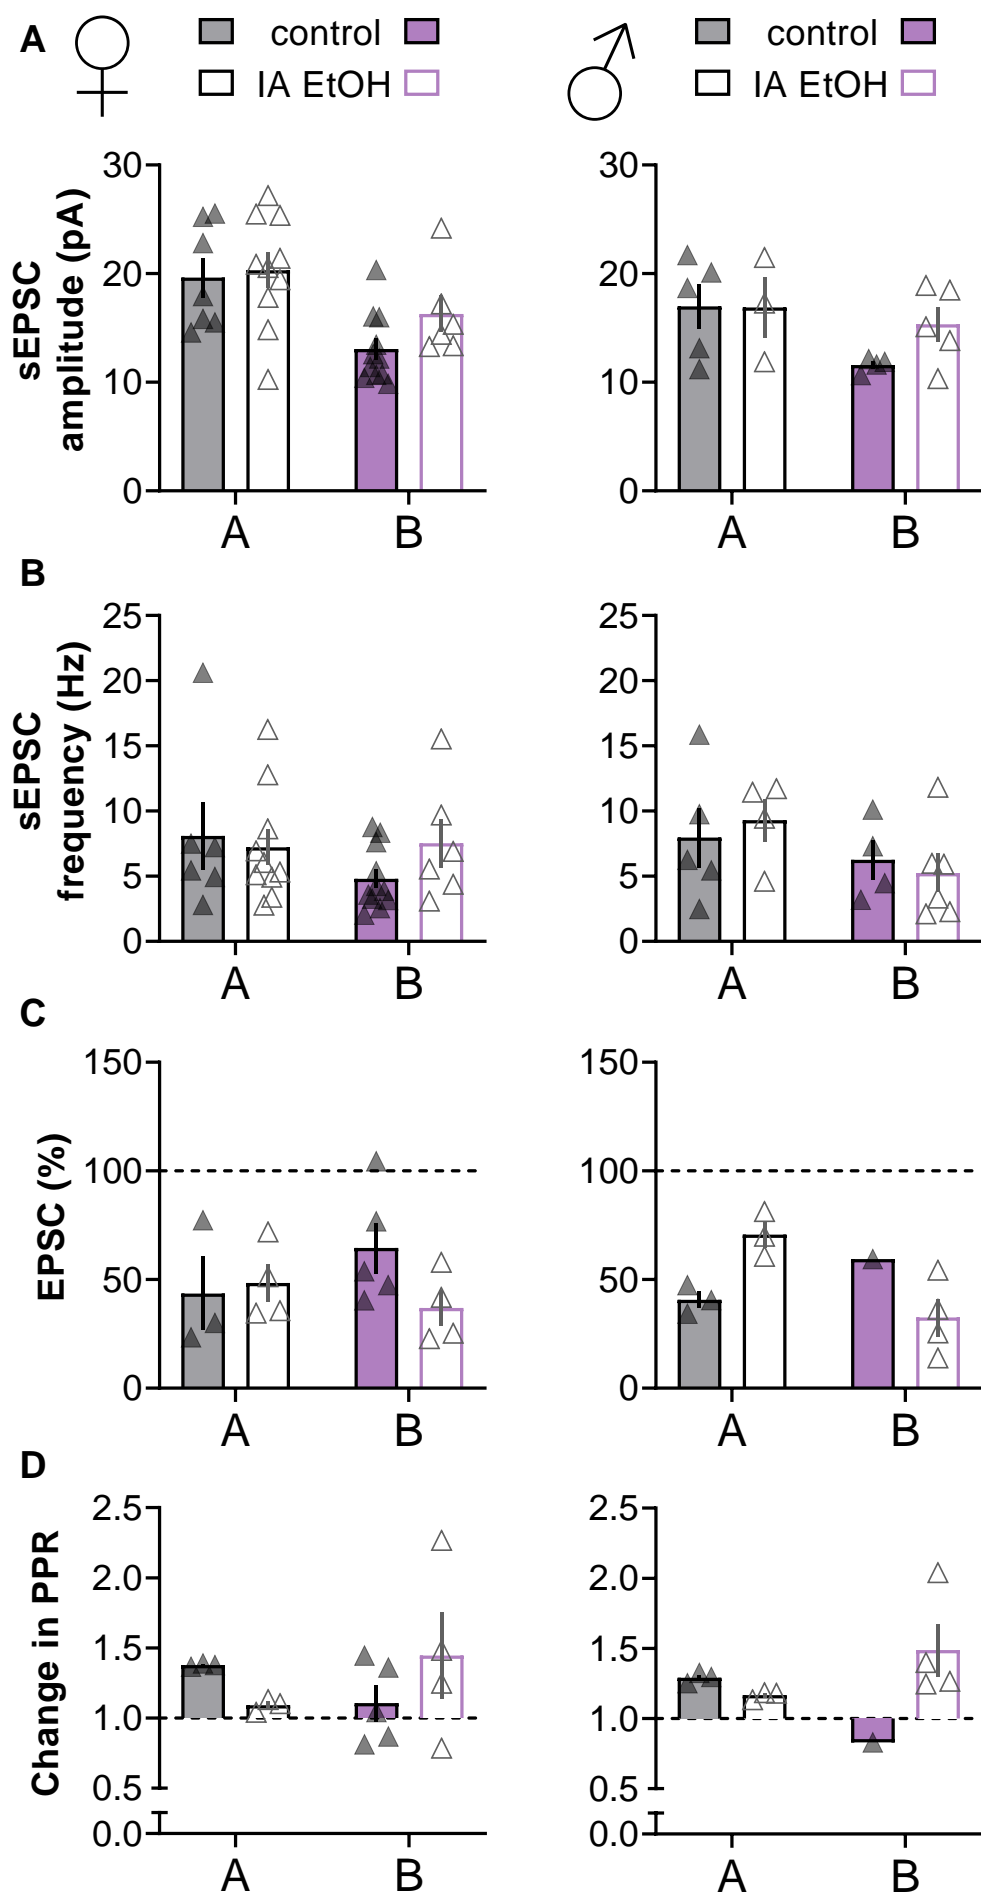

Supplement: NIHMS1661928-supplement-FIG_S2.pdf [file NIHMS1661928-supplement-FIG_S2.pdf]
